# Supplementary material for: The Protective Effect of Yi Shen Juan Bi Pill in Arthritic Rats with Castration-Induced Kidney Deficiency
Source: Hindawi journal article supplement (doi:10.1155/2012/102641), 2012-01-01
Supplement: f1 [file 102641.f1.pdf]

**S 1. Hormone levels in serum from male rats by group (mean±SD)**

| Group                            | Dihydrotestosterone (pg/ml) | Testosterone (ng/ml) | Estradiol (pg/ml) |
|----------------------------------|-----------------------------|----------------------|-------------------|
| Sham control rats                | 162.49 ± 24.25              | 0.86 ± 0.07          | 44.16 ± 9.38      |
| CIA rats                         | 147.47 ± 28.90              | 0.74 ± 0.10*         | 39.42 ± 9.98      |
| CIA rats with castration         | 76.07 ± 5.34**              | 0.39 ± 0.36**        | 14.15 ± 4.88**    |
| Castrated CIA with YJB treatment | 72.01 ± 3.57**              | 0.40 ± 0.20**        | 15.13 ± 4.25**    |

\*  $p < 0.05$ , \*\*  $p < 0.01$  vs. sham control group
