# Supplementary material for: The Protective Effect of Yi Shen Juan Bi Pill in Arthritic Rats with Castration-Induced Kidney Deficiency
Source: Hindawi journal article supplement (doi:10.1155/2012/102641), 2012-01-01
Supplement: f2 [file 102641.f2.pdf]

S 2. Significantly changed metabolites in the male rat's serum when disturbed by YJB

| <i>t</i> | <i>m/z</i> | <i>Ionization mode</i> | <i>Metabolite</i>                                                   | <i>Peak area (mean±SD)</i> |               |              |   | <i>P-value</i>                 |                               |
|----------|------------|------------------------|---------------------------------------------------------------------|----------------------------|---------------|--------------|---|--------------------------------|-------------------------------|
|          |            |                        |                                                                     | Sham control               | Castrated CIA | YJB treated  |   | Sham control vs. Castrated CIA | YJB-treated vs. Castrated CIA |
| 15.4     | 496.3      | ESI+                   | LPC C16:0                                                           | 903.7±55.6                 | 1014.5±72.2   | 967.3±65.4   | ↓ | 0.003                          | 0.17                          |
| 16.0     | 522.3      | ESI+                   | LPC C18:1                                                           | 222.3±21.8                 | 179.1±17.8    | 194.7±30.0   | ↑ | 0.000043                       | 0.2                           |
| 17.0     | 525.3      | ESI+                   | Isotope of LPC C18:0                                                | 312.9±28.6                 | 363.7±51.0    | 303.5±34.4   |   | 0.03                           | 0.01                          |
| 17.1     | 524.3      | ESI+                   | LPC C18:0                                                           | 1185.4±93.5                | 1388.7±111.4  | 1219.9±105.7 | ↓ | 0.001                          | 0.005                         |
| 19.2     | 303.2      | ESI-                   | FFA C20:4                                                           | 163.8±19.6                 | 134.3±12.5    | 146.9±20.8   | ↑ | 0.002                          | 0.14                          |
| 15.4     | 566.3      | ESI-                   | LPC C18:1 [M <sup>+</sup> HCOO] <sup>-</sup>                        | 251.4±25.8                 | 218.5±12.9    | 228.6±15.1   | ↑ | 0.006                          | 0.18                          |
| 15.4     | 506.3      | ESI-                   | LPC C18:1 [M <sup>-</sup> CH <sub>3</sub> ] <sup>-</sup>            | 281.4±33.5                 | 235.8±29.6    | 238.4±20.4   |   | 0.009                          | 0.83                          |
| 19.0     | 327.2      | ESI-                   | FFA C22:6                                                           | 86.1±21.4                  | 59.5±11.1     | 71.0±17.1    | ↑ | 0.005                          | 0.11                          |
| 14.5     | 528.3      | ESI-                   | LPC C20:4 [M <sup>-</sup> CH <sub>3</sub> ] <sup>-</sup>            | 250.6±24.3                 | 222.9±22.7    | 197.7±10.6   | ↓ | 0.03                           | 0.008                         |
| 14.7     | 540.3      | ESI-                   | LPC C16:0 [M <sup>+</sup> HCOO] <sup>-</sup>                        | 555.5±60.9                 | 688.5±79.2    | 622.3±29.3   | ↓ | 0.002                          | 0.04                          |
| 16.5     | 569.3      | ESI-                   | Isotope of LPC C18:0 [M <sup>+</sup> HCOO] <sup>-</sup>             | 160.8±8.6                  | 235.9±40.0    | 192.1±23.4   |   | 0.000041                       | 0.014                         |
| 16.5     | 568.3      | ESI-                   | LPC C18:0 [M <sup>+</sup> HCOO] <sup>-</sup>                        | 585.8±35.1                 | 786.8±124.5   | 664.0±41.2   | ↓ | 0.001                          | 0.02                          |
| 16.5     | 508.3      | ESI-                   | LPC C18:0 [M <sup>-</sup> CH <sub>3</sub> ] <sup>-</sup>            | 507.1±33.6                 | 639.7±79.2    | 542.6±51.4   | ↓ | 0.000078                       | 0.007                         |
| 16.4     | 509.3      | ESI-                   | Isotope of LPC C18:0 [M <sup>-</sup> CH <sub>3</sub> ] <sup>-</sup> | 131.9±9.6                  | 189±36.0      | 148.5±6.8    |   | 0.001                          | 0.097                         |
| 14.7     | 480.3      | ESI-                   | LPC C16:0 [M <sup>-</sup> CH <sub>3</sub> ] <sup>-</sup>            | 600.5±65.0                 | 727.3±75.7    | 666.5±30.4   |   | 0.002                          | 0.048                         |
| 14.4     | 241.4      | ESI-                   | unknown                                                             | 49.7±19.0                  | 15±5.3        | 11.0±2.1     |   | 0.001                          | 0.06                          |
| 14.5     | 588.3      | ESI-                   | LPC C20:4 [M <sup>+</sup> HCOO] <sup>-</sup>                        | 241.8±21.9                 | 208.3±21.9    | 186.2±12.9   | ↓ | 0.007                          | 0.02                          |
| 13.8     | 478.3      | ESI-                   | LPC C16:1 [M <sup>-</sup> CH <sub>3</sub> ] <sup>-</sup>            | 58.2±10.7                  | 41±6.2        | 51.7±7.5     | ↑ | 0.000092                       | 0.005                         |
| 18.1     | 301.2      | ESI-                   | FFA C20:5                                                           | 23.6±6.5                   | 9.7±2.5       | 11.9±4.5     | ↑ | 0.0000021                      | 0.22                          |
| 20.6     | 281.2      | ESI-                   | FFA C18:1                                                           | 41.5±8.4                   | 29.0±6.0      | 36.2±12.1    | ↑ | 0.003                          | 0.13                          |
